# Supplementary material
Source: PubMed Central journal article supplement (PMC4844241)
Supplement: supp_WNL.0000000000002614_Tables.pdf [file supp_WNL.0000000000002614_Tables.pdf]

| <b>Table e-1: Care and outcomes of patients with TIA admitted to hospital and discharged from the ED with and without referral to a stroke prevention clinic (SPC)</b> |                              |                                                  |                                            |                |
|------------------------------------------------------------------------------------------------------------------------------------------------------------------------|------------------------------|--------------------------------------------------|--------------------------------------------|----------------|
|                                                                                                                                                                        | <b>Admitted<br/>N = 1676</b> | <b>Discharged,<br/>SPC referral<br/>N = 2578</b> | <b>Discharged,<br/>no SPC<br/>N = 1246</b> | <b>p-value</b> |
| Brain imaging within 24 h - %                                                                                                                                          | 94.1                         | 87.4                                             | 67.6                                       | <.001          |
| Brain imaging within 7 d - %                                                                                                                                           | 97.8                         | 91.9                                             | 74.9                                       | <.001          |
| Carotid imaging within 48 h - %                                                                                                                                        | 55.4                         | 26.6                                             | 14.9                                       | <.001          |
| Anticoagulation at discharge in subgroup with atrial fibrillation - %                                                                                                  | 78.5                         | 68.2                                             | 64.8                                       | .03            |
| Antithrombotic therapy at discharge - %                                                                                                                                | 94.2                         | 89.9                                             | 80.0                                       | <.001          |
| Antihypertensive therapy within 30 d - %                                                                                                                               | 64.4                         | 57.4                                             | 56.6                                       | <.001          |
| Lipid lowering therapy within 30 d - %                                                                                                                                 | 58.0                         | 44.7                                             | 37.0                                       | <.001          |
| Cardiac rhythm monitoring within 30 d - %                                                                                                                              | 37.9                         | 32.7                                             | 16.7                                       | <.001          |
| Carotid revascularization within 14 d - %                                                                                                                              | 1.4                          | 0.7                                              | 0.6                                        | .008           |
| Death within 30 d - %                                                                                                                                                  | 0.8                          | 0.2                                              | 1.2                                        | .01            |
| Death within 1 y - %                                                                                                                                                   | 7.9                          | 3.7                                              | 9.9                                        | <.001          |
| Stroke* within 7 d - %                                                                                                                                                 | 0.9                          | 8.2                                              | 8.2                                        | <.001          |
| Stroke within 30 d - %                                                                                                                                                 | 3.0                          | 10.7                                             | 10.6                                       | <.001          |
| Stroke within 1 y - %                                                                                                                                                  | 10.6                         | 16.0                                             | 17.9                                       | <.001          |
| Stroke or death within 7 d - %                                                                                                                                         | 1.0                          | 8.2                                              | 8.3                                        | <.001          |
| Stroke or death within 30 d - %                                                                                                                                        | 3.6                          | 10.9                                             | 11.2                                       | <.001          |
| Stroke or death within 1 y - %                                                                                                                                         | 17.1                         | 18.7                                             | 25.1                                       | <.001          |

TIA= transient ischemic attack; ED = emergency department; SPC indicates stroke prevention clinic

\*Data only available for patients aged over 65 years

Brain imaging includes computed tomography (CT) and magnetic resonance imaging (MRI) of the brain. Carotid imaging includes ultrasound, CT angiography, MR angiography and catheter angiography. Anticoagulation includes warfarin, dabigatran, rivaroxaban, apixaban. Antithrombotic therapy includes any anticoagulant or antiplatelet agent. Cardiac rhythm monitoring includes telemetry, Holter or other ambulatory cardiac monitoring performed either during the inpatient phase or within 30 days of discharge. Stroke is defined as an emergency department visit or hospitalization for stroke.

| <b>Table e-2: Care and outcomes of patients with minor ischemic stroke admitted to hospital and discharged from the ED with and without referral to a stroke prevention clinic (SPC)</b> |                              |                                                 |                                           |                |
|------------------------------------------------------------------------------------------------------------------------------------------------------------------------------------------|------------------------------|-------------------------------------------------|-------------------------------------------|----------------|
|                                                                                                                                                                                          | <b>Admitted<br/>N = 2278</b> | <b>Discharged,<br/>SPC referral<br/>N = 498</b> | <b>Discharged,<br/>no SPC<br/>N = 187</b> | <b>p-value</b> |
| Brain imaging within 24 h - %                                                                                                                                                            | 95.5                         | 91.8                                            | 88.8                                      | <.001          |
| Brain imaging within 7 d - %                                                                                                                                                             | 99.0                         | 95.2                                            | 94.1                                      | <.001          |
| Carotid imaging within 48 h - %                                                                                                                                                          | 55.9                         | 29.9                                            | 23.0                                      | <.001          |
| Anticoagulation at discharge in subgroup with atrial fibrillation - %                                                                                                                    | 80.7                         | 71.2                                            | 57.1                                      | .01            |
| Antithrombotic therapy at discharge - %                                                                                                                                                  | 94.2                         | 93.4                                            | 77.0                                      | <.001          |
| Antihypertensive therapy within 30 d - %                                                                                                                                                 | 63.1                         | 61.7                                            | 63.5                                      | .88            |
| Lipid lowering therapy within 30 d - %                                                                                                                                                   | 58.9                         | 48.5                                            | 40.1                                      | <.001          |
| Cardiac rhythm monitoring within 30 d - %                                                                                                                                                | 41.7                         | 36.1                                            | 20.9                                      | <.001          |
| Carotid revascularization within 14 d - %                                                                                                                                                | 1.4                          | 0.8                                             | 1.1                                       | <.54           |
| Death within 30 d - %                                                                                                                                                                    | 0.9                          | 0.2                                             | 2.7                                       | <.008          |
| Death within 1 y - %                                                                                                                                                                     | 8.1                          | 3.4                                             | 11.2                                      | <.001          |
| Stroke* within 7 d - %                                                                                                                                                                   | 0.7                          | 11.8                                            | 10.7                                      | <.001          |
| Stroke within 30 d - %                                                                                                                                                                   | 2.5                          | 14.7                                            | 15.5                                      | <.001          |
| Stroke within 1 y - %                                                                                                                                                                    | 9.4                          | 20.1                                            | 22.5                                      | <.001          |
| Stroke or death within 7 d - %                                                                                                                                                           | 0.8                          | 11.8                                            | 11.2                                      | <.001          |
| Stroke or death within 30 d - %                                                                                                                                                          | 3.2                          | 14.9                                            | 16.6                                      | <.001          |
| Stroke or death within 1 y - %                                                                                                                                                           | 16.0                         | 22.5                                            | 29.4                                      | <.001          |

TIA= transient ischemic attack; ED = emergency department; SPC indicates stroke prevention clinic

\*Data only available for patients aged over 65 years

Brain imaging includes computed tomography (CT) and magnetic resonance imaging (MRI) of the brain. Carotid imaging includes ultrasound, CT angiography, MR angiography and catheter angiography. Anticoagulation includes warfarin, dabigatran, rivaroxaban, apixaban. Antithrombotic therapy includes any anticoagulant or antiplatelet agent. Cardiac rhythm monitoring includes telemetry, Holter or other ambulatory cardiac monitoring performed either during the inpatient phase or within 30 days of discharge. Stroke is defined as an emergency department visit or hospitalization for stroke.

| <b>Table e-3: Care and outcomes of patients with transient ischemic attack or minor ischemic stroke admitted to hospital and discharged from the ED with and without referral to a stroke prevention clinic (SPC), among patients seen at hospitals with an SPC on-site</b> |                              |                                                  |                                           |                |
|-----------------------------------------------------------------------------------------------------------------------------------------------------------------------------------------------------------------------------------------------------------------------------|------------------------------|--------------------------------------------------|-------------------------------------------|----------------|
|                                                                                                                                                                                                                                                                             | <b>Admitted<br/>N = 2803</b> | <b>Discharged,<br/>SPC referral<br/>N = 2203</b> | <b>Discharged,<br/>no SPC<br/>N = 658</b> | <b>p-value</b> |
| Brain imaging within 24 h - %                                                                                                                                                                                                                                               | 96.6                         | 91.1                                             | 79.0                                      | <.001          |
| Brain imaging within 7 d - %                                                                                                                                                                                                                                                | 98.9                         | 93.9                                             | 83.0                                      | <.001          |
| Carotid imaging within 48 h - %                                                                                                                                                                                                                                             | 63.1                         | 27.6                                             | 17.0                                      | <.001          |
| Anticoagulation at discharge in subgroup with atrial fibrillation - %                                                                                                                                                                                                       | 78.7                         | 66.8                                             | 59.6                                      | <.001          |
| Antithrombotic therapy at discharge - %                                                                                                                                                                                                                                     | 94.5                         | 89.7                                             | 79.0                                      | <.001          |
| Antihypertensive therapy within 30 d* - %                                                                                                                                                                                                                                   | 64.7                         | 56.9                                             | 57.1                                      | <.001          |
| Lipid lowering therapy within 30 d* - %                                                                                                                                                                                                                                     | 60.9                         | 44.8                                             | 37.3                                      | <.001          |
| Cardiac rhythm monitoring within 30 d - %                                                                                                                                                                                                                                   | 42.1                         | 31.8                                             | 14.4                                      | <.001          |
| Carotid revascularization within 14 d - %                                                                                                                                                                                                                                   | 1.8                          | 0.8                                              | 0.5                                       | .001           |
| Death within 30 d - %                                                                                                                                                                                                                                                       | 1.0                          | 0.3                                              | 1.7                                       | <.001          |
| Death within 1 y - %                                                                                                                                                                                                                                                        | 7.5                          | 4.0                                              | 12.3                                      | <.001          |
| Stroke within 7 d - %                                                                                                                                                                                                                                                       | 0.7                          | 7.6                                              | 6.7                                       | <.001          |
| Stroke within 30 d - %                                                                                                                                                                                                                                                      | 3.0                          | 10.1                                             | 9.3                                       | <.001          |
| Stroke within 1 y - %                                                                                                                                                                                                                                                       | 10.9                         | 15.8                                             | 16.6                                      | <.001          |
| Stroke or death within 7 d - %                                                                                                                                                                                                                                              | 0.9                          | 7.6                                              | 7.0                                       | <.001          |
| Stroke or death within 30 d - %                                                                                                                                                                                                                                             | 3.8                          | 10.3                                             | 10.2                                      | <.001          |
| Stroke or death within 1 y - %                                                                                                                                                                                                                                              | 16.9                         | 18.6                                             | 25.7                                      | <.001          |

TIA= transient ischemic attack; ED = emergency department; SPC indicates stroke prevention clinic

\*Data only available for patients aged over 65 years

Brain imaging includes computed tomography (CT) and magnetic resonance imaging (MRI) of the brain. Carotid imaging includes ultrasound, CT angiography, MR angiography and catheter angiography. Anticoagulation includes warfarin, dabigatran, rivaroxaban, apixaban. Antithrombotic therapy includes any anticoagulant or antiplatelet agent. Cardiac rhythm monitoring includes telemetry, Holter or other ambulatory cardiac monitoring performed either during the inpatient phase or within 30 days of discharge. Stroke is defined as an emergency department visit or hospitalization for stroke.
